# Supplementary material for: Functional links between clustered microRNAs: suppression of cell-cycle inhibitors by microRNA clusters in gastric cancer
Source: PubMed Central journal article supplement — Nucleic Acids Res. 2009 Jan 19;37(5):1672–81. doi: 10.1093/nar/gkp002 (PMC2655672; doi:10.1093/nar/gkp002), 2009-01-19
Supplement: gkp002_2.pdf [file gkp002_2.pdf]

## Supplementary Figure S1

hsa-miR-302d -UAAGUGCCUUCCAUGUUUGAGUGU  
hsa-miR-302c -UAAGUGCCUUCCAUGUUUCAGUGG  
hsa-miR-302b -UAAGUGCCUUCCAUGUUUUAGUAG  
hsa-miR-302a -UAAGUGCCUUCCAUGUUUUGGUGA  
hsa-miR-17 CAAAGUGCCUUACA-GUGCAGGUAG  
hsa-miR-20a UAAAGUGCCUUUAU-GUGCAGGUAG  
hsa-miR-20b CAAAGUGCCUCAUA-GUGCAGGUAG  
hsa-miR-93 CAAAGUGCCUGUUC-GUGCAGGUAG  
hsa-miR-106a AAAAGUGCCUUACA-GUGCAGGUAG  
hsa-miR-106b UAAAGUGCCUGACA-GUGCAGAU--  
hsa-miR-18b UAAGGUGCCAUCA-GUGCAGUUAG  
hsa-miR-18a UAAGGUGCCAUCA-GUGCAGAUAG

hsa-miR-19b UGUGCAAAUCCAUGCAAACUGA  
hsa-miR-19a UGUGCAAAUCUAUGCAAACUGA

hsa-miR-25 CAUUGCACUUGUCUCGGUCUGA  
hsa-miR-32 UAUUGCACAUUACUAAGUUGCA  
hsa-miR-92b UAUUGCACCUCGUCCCGGCCUCC  
hsa-miR-92a UAUUGCACUUGUCCCGGCCUGU  
hsa-miR-363 AAUUGCACGGUAUCCAUCUGUA  
hsa-miR-367 AAUUGCACCUUUAGCAAUGGUGA

chr 13: 17 ~ 18a ~ 19a ~ 20a ~ 19b-1 ~ 92a-1  
chr X: 106a ~ 18b ~ 20b ~ 19b-2 ~ 92-2 ~ 363  
chr 7: 106b ~ 93 ~ 25  
chr 4: 302b ~ 302c ~ 302a ~ 302d ~ 367  
chr 9: 32
