# Supplementary figures and images for: Functional links between clustered microRNAs: suppression of cell-cycle inhibitors by microRNA clusters in gastric cancer
Source: PubMed Central journal article supplement — Nucleic Acids Res. 2009 Jan 19;37(5):1672–81. doi: 10.1093/nar/gkp002 (PMC2655672; doi:10.1093/nar/gkp002), 2009-01-19

## Supplementary Figure S2

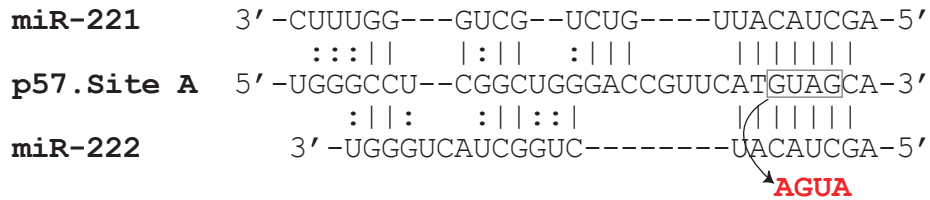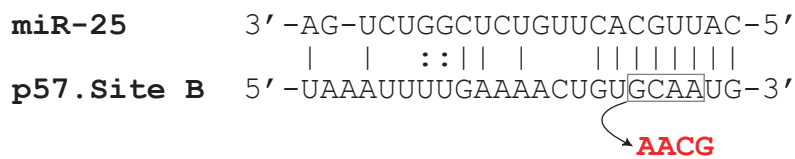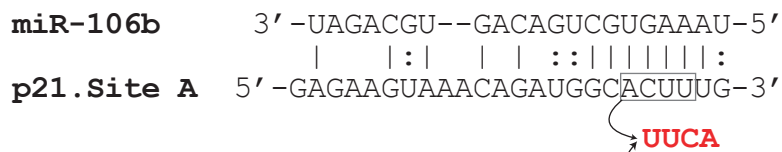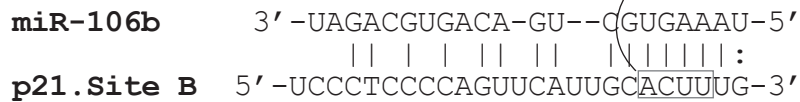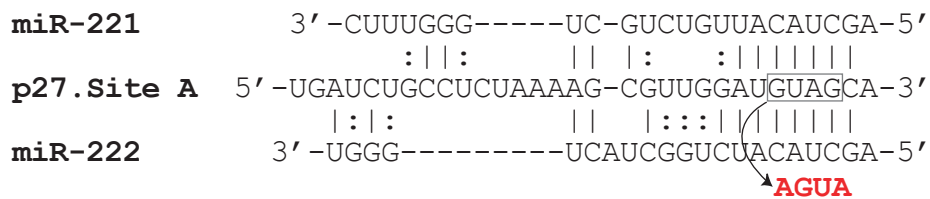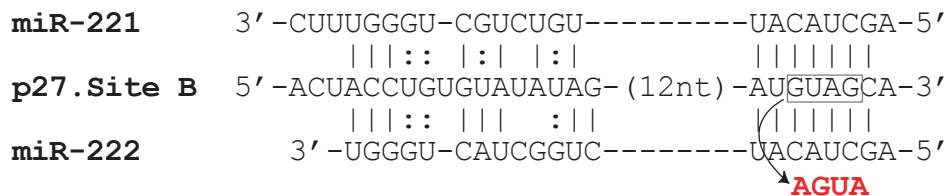

Supplement: gkp002_3.pdf [file gkp002_3.pdf]

## Supplementary Figure S3

### A Western blot

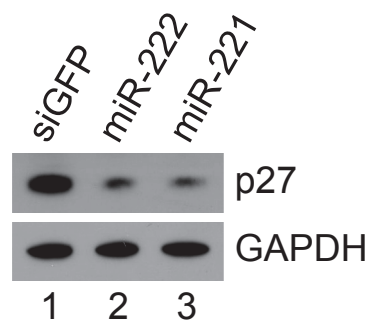

### B Western blot

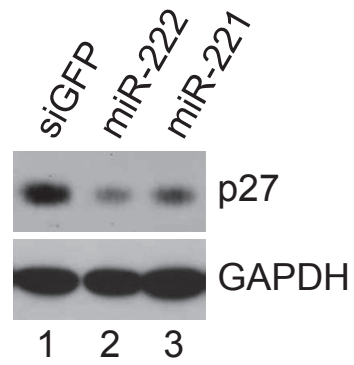

Supplement: gkp002_4.pdf [file gkp002_4.pdf]

## Supplementary Figure S4

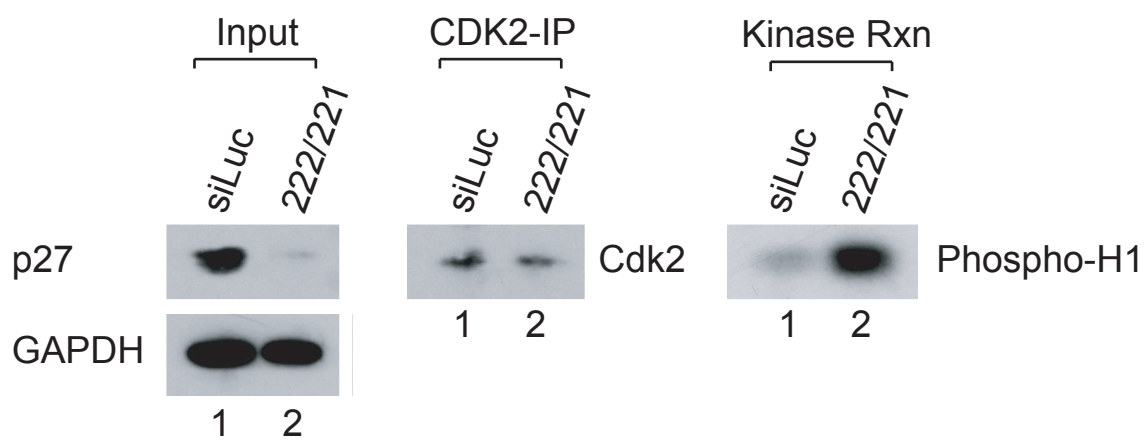

Supplement: gkp002_5.pdf [file gkp002_5.pdf]

## Supplementary Figure S5

### A Northern blot

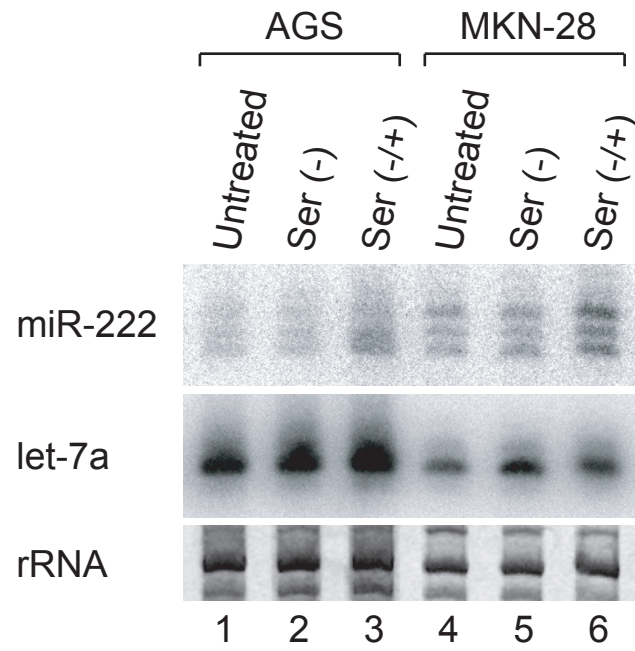

### B Western blot

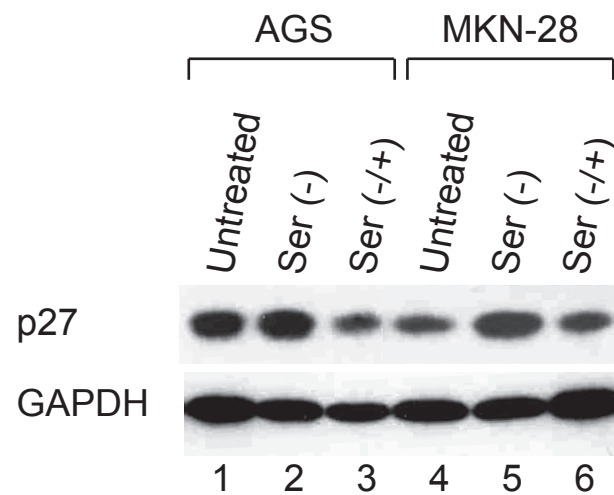

Supplement: gkp002_6.pdf [file gkp002_6.pdf]
